# Supplementary material for: Genome-Wide SNP Calling Using Next Generation Sequencing Data in Tomato
Source: PubMed Central journal article supplement — Mol Cells. 2014 Jan 27;37(1):36–42. doi: 10.14348/molcells.2014.2241 (PMC3907006; doi:10.14348/molcells.2014.2241), 2014-01-27
Supplement: molcell-37-1-36-6-supplementary.pdf [file molcell-37-1-36-6-supplementary.pdf]

## Supplementary file

1

2

3 **Supplementary Table 1.** Statistics of SNPs identified from the tomato reference  
4 genome using own raw data.

5

| SNP type        | Pileup (default) |
|-----------------|------------------|
| Homo-type       | 10,699 (12.2%)   |
| ref = N         | 4,647            |
| SNP             | 6,052            |
| Hetero-type     | 77,230 (87.8%)   |
| ref = N         | 120              |
| SNP             | 77,110           |
| Total # of SNPs | 87,929           |

6

7

8 **Supplementary Table 2.** Comparison of commonly detected (A) homo-type and (B)  
 9 hetero-type SNPs across the sequence coverage between pileup and new\_pileup.  
 10 The first number in each cell corresponds to SNP callers produced by the pileup data  
 11 set. Data produced by the new\_pileup is indicated in parentheses.

12

13 **(A)**

| coverage | 2x                         | 10x                      | 20x                    | 40x                    |
|----------|----------------------------|--------------------------|------------------------|------------------------|
| 2x       | 3,099 (7,469) <sup>a</sup> |                          |                        |                        |
| 10x      | 1,360 (5,046)              | 388 (1,477) <sup>a</sup> |                        |                        |
| 20x      | 1,172 (4,502)              | 4,905 (9,300)            | 108 (575) <sup>a</sup> |                        |
| 40x      | 1,148 (4,076)              | 4,844 (8,573)            | 5,526 (9,475)          | 471 (980) <sup>a</sup> |

14

15 **(B)**

| coverage | 2x                              | 10x                              | 20x                             | 40x                             |
|----------|---------------------------------|----------------------------------|---------------------------------|---------------------------------|
| 2x       | 51,244<br>(23,695) <sup>a</sup> |                                  |                                 |                                 |
| 10x      | 32,153<br>(34,151)              | 39,665<br>(103,348) <sup>a</sup> |                                 |                                 |
| 20x      | 24,050<br>(29,357)              | 79,515<br>(121,458)              | 13,373<br>(23,871) <sup>a</sup> |                                 |
| 40x      | 12,158<br>(2,959)               | 51,114<br>(107,940)              | 64,112<br>(127,867)             | 11,102<br>(23,924) <sup>a</sup> |

16 <sup>a</sup>The number of SNPs found in one sample.

17



31 Read depth, the number of reads covering the position; Base of short read covering  
32 each SNP position, the aligned bases of all reads covering this genomic position.

33 In (B), Position, position within the chromosome; Ref. seq., sequence of the  
34 reference genome (Heinz 1706); Consensus seq., the consensus sequence of  
35 sample (Heinz 1706); Short reads of sample, the aligned all reads to reference  
36 sequence.

37

38

(A)

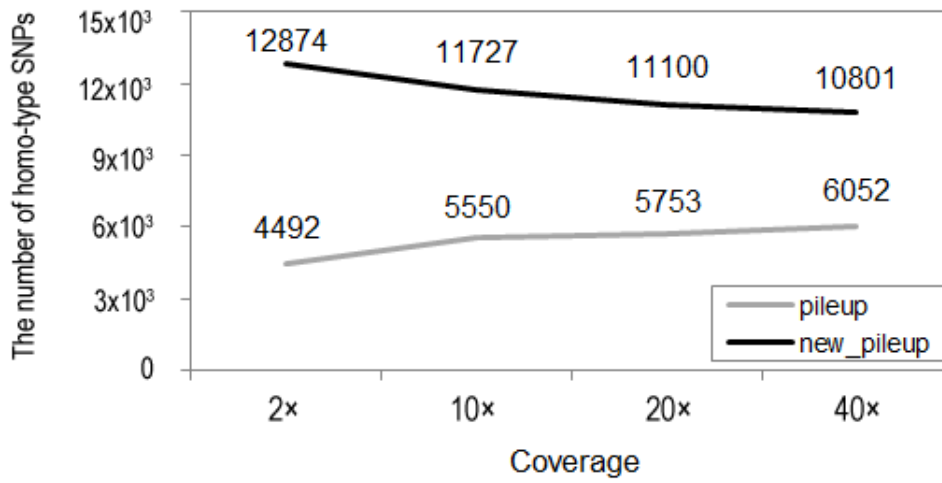

39

40

(B)

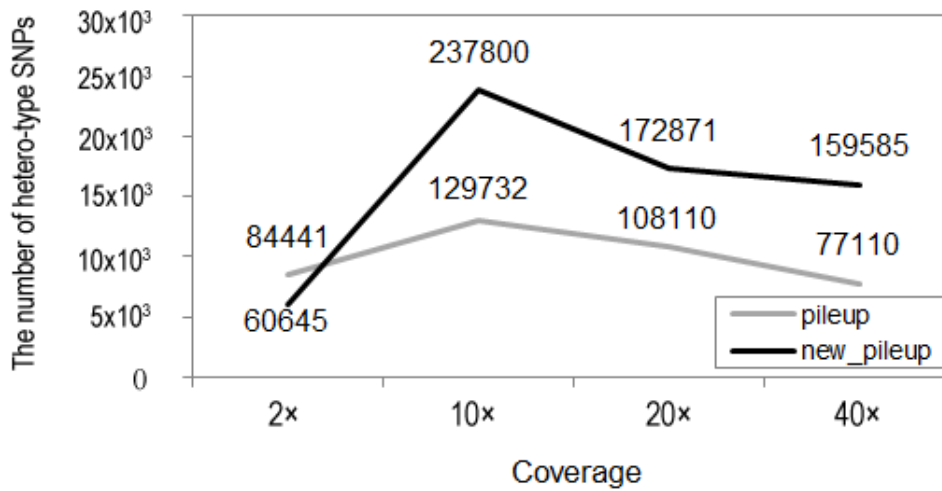

41

42

43 **Supplementary Figure 2.** Comparison of the number of homo- and hetero-type  
44 SNPs detected by pileup versus new\_pileup. Line graph showing the number of (A)  
45 homo-type and (B) hetero-type SNPs identified by pileup and new\_pileup analysis  
46 according to the genome coverage of raw data.

47

48

(A)

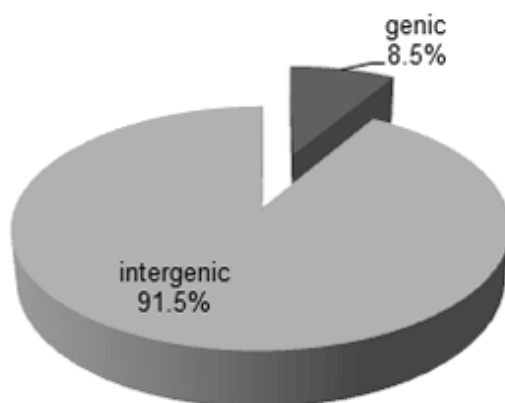

49

50

(B)

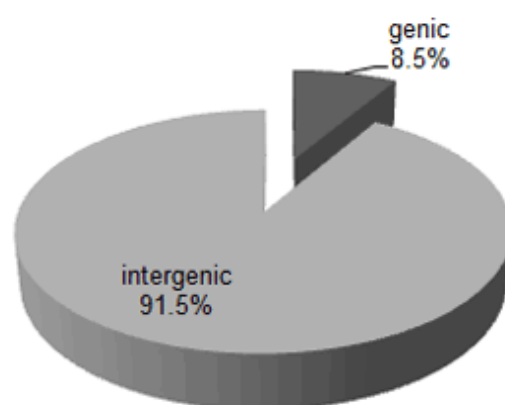

51

52

(C)

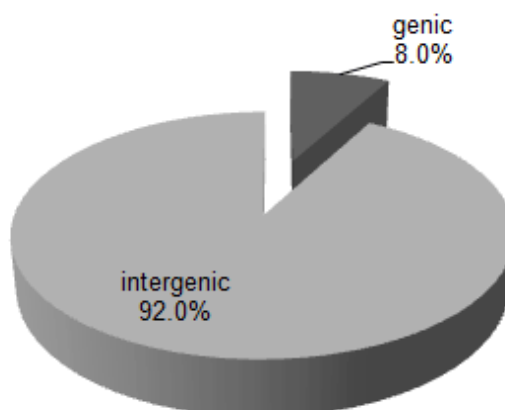

53

54 **Supplementary Figure 3.** The distribution of identified SNPs according to genome  
55 structure. The percentage of (A) total SNPs, (B) homo-type SNPs, and (C) hetero-  
56 type SNPs detected in *S. pimpinellifolium* are shown. More than 90 percent of all  
57 SNPs were located within intergenic regions.

58

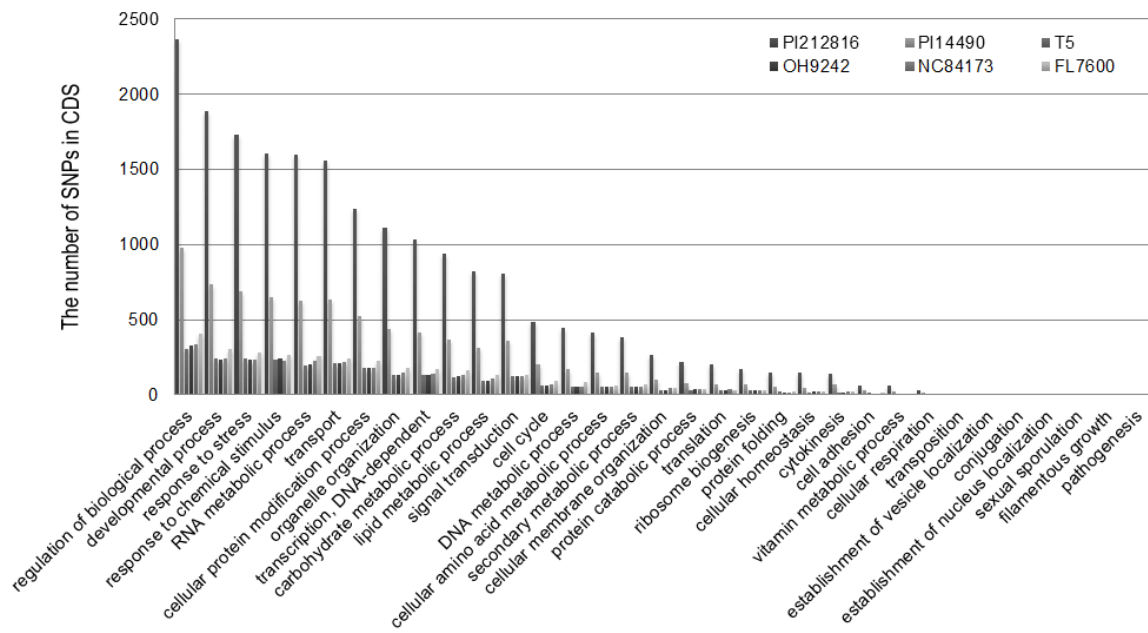

59

60 **Supplementary Figure 4.** Gene ontology classifications for six transcriptome data  
 61 sets. SNPs identified within the coding region (CDS) corresponded to the biological  
 62 process (BP) category. The y-axis indicates the number of SNPs represented from  
 63 six transcriptomes (except M82) while the x-axis indicates the GO term of BP with  
 64 depth equal to 2.

65
